# Supplementary material
Source: PubMed Central journal article supplement (PMC2800920)

## **SUPPLEMENTARY FIGURE LEGENDS**

### **Table S1**

Echo analysis three weeks after TAC or SHAM surgery.

### **Figure S1**

Representative immunoblot of skeletal muscle GLUT4 levels at sarcolemmal fractions from patients with NIDDM or LVD as compared to controls. Levels were variable but unchanged between the patient groups.

### **Figure S2**

Representative immunoblot of IRS1 protein levels in total cell lysates from heart biopsies of patients with NIDDM or LVD and controls. Levels of IRS1 were unchanged across the patient groups.

### **Figure S3**

Autoradiograph of myocardial IRS1-PI3K activity in TAC vs. controls (n = 3) as determined by *in vitro* kinase assay.

### **Figure S4**

Representative immunoblots of myocardial phospho-AMPK (top panel), AMPK (middle panel) and GAPDH (lower panel) expression in TAC-induced and sham operated mice.

# Supplementary Data

Table 1

ECHO ANALYSIS 3 WEEKS AFTER TAC OR SHAM

| Treatment  | Wall Thickness (mm) (PWT + IVS/2) | Fractional Shortening (%) | Left Ventricular Diastolic Dimension (mm) |
|------------|-----------------------------------|---------------------------|-------------------------------------------|
| SHAM (n=3) | 1.01 +/- 0.092                    | 71 +/- 3                  | 2.43 +/- 0.057                            |
| TAC (n=3)  | 1.34 +/- 0.043 **<br>(p= 0.0013)  | 57 +/- 11<br>(p = 0.09)   | 2.54 +/- 0.297<br>(p = 0.56, ns)          |

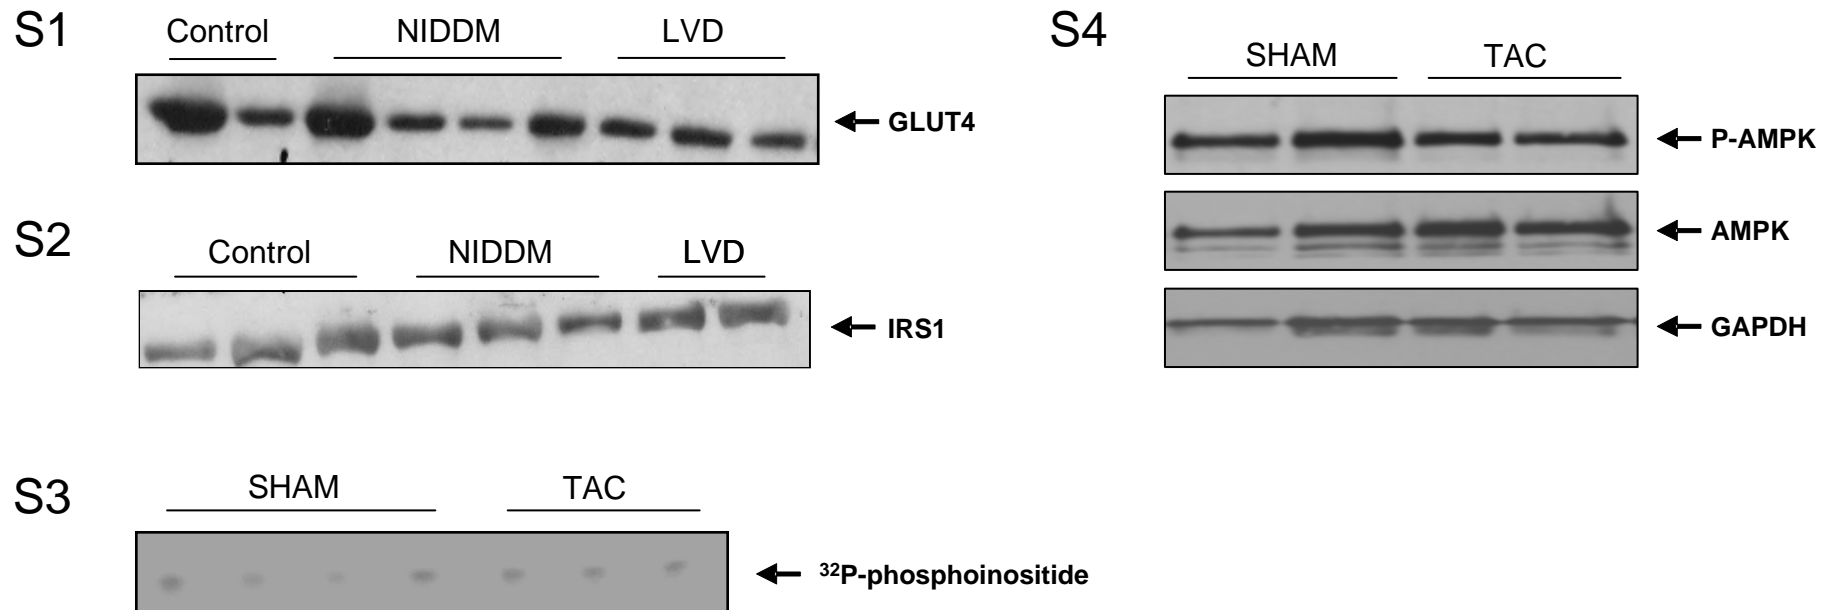

Supplement: ehp396_1.pdf [file ehp396_1.pdf]
